# Supplementary material for: Evidence of trospium’s ability to mitigate cholinergic adverse events related to xanomeline: phase 1 study results
Source: PubMed Central journal article supplement (PMC10102054; doi:10.1007/s00213-023-06362-2), 2023-04-10
Supplement: 213_2023_6362_MOESM3_ESM.pdf [file 213_2023_6362_MOESM3_ESM.pdf]

**Article Title:** Evidence of trospium's ability to mitigate cholinergic adverse events related to xanomeline:  
phase 1 study results

**Journal Name:** *Psychopharmacology*

**Author Names:** Alan Breier, Stephen K. Brannan, Steven M. Paul, Andrew C. Miller

**Corresponding Author:** Andrew C. Miller; Karuna Therapeutics, Boston, MA, USA;  
amiller@karunatx.com, (857) 449-2244

### **SUPPLEMENTARY INFORMATION 3: EXPLORATORY ENDPOINTS**

**Table S1** Patient-reported nausea and vomiting during the active phase (Days 3–9) as assessed  
by the Postoperative Nausea and Vomiting scale

**Table S2** Patient-reported salivation during the active phase (Days 3–9) as assessed by the  
Unified Parkinson's Disease Rating Scale salivation subscale

**Table S3** Patient-reported sweating during the active phase (Days 3–9) as assessed by the  
Hyperhidrosis Disease Severity Scale

**Table S4** Bristol Stool Form Scale

**Table S1** Patient-reported nausea and vomiting during the active phase (Days 3-9) as assessed by the Postoperative Nausea and Vomiting scale

| Question<br>Result                                                                                                                | Xanomeline Alone<br>(n = 33) |           | Xanomeline + Trosipium<br>(n = 35) |           |
|-----------------------------------------------------------------------------------------------------------------------------------|------------------------------|-----------|------------------------------------|-----------|
|                                                                                                                                   | N <sup>a</sup>               | n (%)     | N <sup>a</sup>                     | n (%)     |
| Have you experienced a feeling of nausea (an unsettled feeling in the stomach and slight urge to vomit) during the past 24 hours? | 32                           |           | 34                                 |           |
| Not at all                                                                                                                        |                              | 24 (75.0) |                                    | 29 (85.3) |
| Yes, at least once                                                                                                                |                              | 8 (25.0)  |                                    | 5 (14.7)  |
| Have you vomited or had dry-retching during the past 24 hours?                                                                    | 32                           |           | 34                                 |           |
| Not at all                                                                                                                        |                              | 27 (84.4) |                                    | 33 (97.1) |
| Yes, at least once                                                                                                                |                              | 5 (15.6)  |                                    | 1 (2.9)   |

<sup>a</sup>Analyzed in the evaluable population in subjects with ≥1 result reported during the active phase (Days 3–9)

**Table S2** Patient-reported salivation during the active phase (Days 3–9) as assessed by the Unified Parkinson's Disease Rating Scale salivation subscale

| During the past 24 hours, please rate your degree of salivation <sup>a</sup> | Xanomeline Alone<br>( <i>n</i> = 33) |              | Xanomeline + Trosipium<br>( <i>n</i> = 35) |              |
|------------------------------------------------------------------------------|--------------------------------------|--------------|--------------------------------------------|--------------|
|                                                                              | <i>N</i> <sup>b</sup>                | <i>n</i> (%) | <i>N</i> <sup>b</sup>                      | <i>n</i> (%) |
| Day 3                                                                        | 32                                   |              | 34                                         |              |
| Not present                                                                  |                                      | 27 (84.4)    |                                            | 31 (91.2)    |
| Present                                                                      |                                      | 5 (15.6)     |                                            | 3 (8.8)      |
| Day 4                                                                        | 32                                   |              | 34                                         |              |
| Not present                                                                  |                                      | 24 (75.0)    |                                            | 28 (82.4)    |
| Present                                                                      |                                      | 8 (25.0)     |                                            | 6 (17.6)     |
| Day 5                                                                        | 32                                   |              | 33                                         |              |
| Not present                                                                  |                                      | 26 (81.3)    |                                            | 32 (97.0)    |
| Present                                                                      |                                      | 6 (18.8)     |                                            | 1 (3.0)      |
| Day 6                                                                        | 31                                   |              | 33                                         |              |
| Not present                                                                  |                                      | 26 (83.9)    |                                            | 29 (87.9)    |
| Present                                                                      |                                      | 5 (16.1)     |                                            | 4 (12.1)     |
| Day 7                                                                        | 31                                   |              | 33                                         |              |
| Not present                                                                  |                                      | 26 (83.9)    |                                            | 30 (90.9)    |
| Present                                                                      |                                      | 5 (16.1)     |                                            | 3 (9.1)      |
| Day 8                                                                        | 31                                   |              | 33                                         |              |
| Not present                                                                  |                                      | 27 (87.1)    |                                            | 31 (93.9)    |
| Present                                                                      |                                      | 4 (12.9)     |                                            | 2 (6.1)      |
| Day 9                                                                        | 31                                   |              | 31                                         |              |
| Not present                                                                  |                                      | 26 (83.9)    |                                            | 30 (96.8)    |
| Present                                                                      |                                      | 5 (16.1)     |                                            | 1 (3.2)      |

<sup>a</sup>Unified Parkinson's Disease Rating Scale salivation subscale assessed using a 5-point scale of 0 (“none”), 1 (“slight but definite excess of saliva in mouth, may have nighttime drooling”), 2 (“moderately excessive saliva, may have minimal drooling”), 3 (“marked excess of saliva with some drooling”), and 4 (“marked drooling, requires constant tissue or handkerchief”). Salivation “not present” was defined as score of 0; salivation “present” was defined as scores of 1, 2, 3, or 4

<sup>b</sup>Analyzed in the evaluable population in subjects with a reported result at the specified visit

**Table S3** Patient-reported sweating during the active phase (Days 3–9) as assessed by the Hyperhidrosis Disease Severity Scale

| During the past 24 hours, how would you rate the severity of your sweating? <sup>a</sup> | Xanomeline Alone<br>( <i>n</i> = 33) |              | Xanomeline + Trospium<br>( <i>n</i> = 35) |              |
|------------------------------------------------------------------------------------------|--------------------------------------|--------------|-------------------------------------------|--------------|
|                                                                                          | <i>N</i> <sup>b</sup>                | <i>n</i> (%) | <i>N</i> <sup>b</sup>                     | <i>n</i> (%) |
| Day 3                                                                                    | 32                                   |              | 34                                        |              |
| Not present                                                                              |                                      | 27 (84.4)    |                                           | 33 (97.1)    |
| Present                                                                                  |                                      | 5 (15.6)     |                                           | 1 (2.9)      |
| Day 4                                                                                    | 32                                   |              | 34                                        |              |
| Not present                                                                              |                                      | 24 (75.0)    |                                           | 32 (94.1)    |
| Present                                                                                  |                                      | 8 (25.0)     |                                           | 2 (5.9)      |
| Day 5                                                                                    | 32                                   |              | 33                                        |              |
| Not present                                                                              |                                      | 24 (75.0)    |                                           | 33 (100.0)   |
| Present                                                                                  |                                      | 8 (25.0)     |                                           | 0            |
| Day 6                                                                                    | 31                                   |              | 33                                        |              |
| Not present                                                                              |                                      | 21 (67.7)    |                                           | 31 (93.9)    |
| Present                                                                                  |                                      | 10 (32.3)    |                                           | 2 (6.1)      |
| Day 7                                                                                    | 31                                   |              | 33                                        |              |
| Not present                                                                              |                                      | 24 (77.4)    |                                           | 32 (97.0)    |
| Present                                                                                  |                                      | 7 (22.6)     |                                           | 1 (3.0)      |
| Day 8                                                                                    | 31                                   |              | 33                                        |              |
| Not present                                                                              |                                      | 26 (83.9)    |                                           | 32 (97.0)    |
| Present                                                                                  |                                      | 5 (16.1)     |                                           | 1 (3.0)      |
| Day 9                                                                                    | 31                                   |              | 31                                        |              |
| Not present                                                                              |                                      | 25 (80.6)    |                                           | 30 (96.8)    |
| Present                                                                                  |                                      | 6 (19.4)     |                                           | 1 (3.2)      |

<sup>a</sup>Hyperhidrosis Disease Severity Scale assessed using a 4-point scale of 1 (“my sweating is never noticeable and never interferes with my daily activities”), 2 (“my sweating is tolerable but sometimes interferes with my daily activities”), 3 (“my sweating is barely tolerable and frequently interferes with my daily activities”), and 4 (“my sweating is intolerable and always interferes with my daily activities”). Sweating “not present” was defined as score of 1; sweating “present” was defined as scores of 2, 3, or 4

<sup>b</sup>Analyzed in the evaluable population in subjects with a reported result at the specified visit

**Table S4** Bristol Stool Form Scale

| Please rate your stool<br>over the past 24 hours<br>according to the "type" <sup>a</sup> | Xanomeline Alone<br>( <i>n</i> = 33) |              | Xanomeline + Trosipium<br>( <i>n</i> = 35) |              |
|------------------------------------------------------------------------------------------|--------------------------------------|--------------|--------------------------------------------|--------------|
|                                                                                          | <i>N</i> <sup>b</sup>                | <i>n</i> (%) | <i>N</i> <sup>b</sup>                      | <i>n</i> (%) |
| Day 1                                                                                    | 24                                   |              | 23                                         |              |
| Type 1                                                                                   |                                      | 1 (4.2)      |                                            | 0            |
| Type 2                                                                                   |                                      | 5 (20.8)     |                                            | 4 (17.4)     |
| Type 3                                                                                   |                                      | 7 (29.2)     |                                            | 10 (43.5)    |
| Type 4                                                                                   |                                      | 7 (29.2)     |                                            | 8 (34.8)     |
| Type 5                                                                                   |                                      | 3 (12.5)     |                                            | 0            |
| Type 6                                                                                   |                                      | 1 (4.2)      |                                            | 1 (4.3)      |
| Type 7                                                                                   |                                      | 0            |                                            | 0            |
| Day 2                                                                                    | 26                                   |              | 28                                         |              |
| Type 1                                                                                   |                                      | 2 (7.7)      |                                            | 1 (3.6)      |
| Type 2                                                                                   |                                      | 3 (11.5)     |                                            | 4 (14.3)     |
| Type 3                                                                                   |                                      | 8 (30.8)     |                                            | 13 (46.4)    |
| Type 4                                                                                   |                                      | 9 (34.6)     |                                            | 7 (25.0)     |
| Type 5                                                                                   |                                      | 1 (3.8)      |                                            | 2 (7.1)      |
| Type 6                                                                                   |                                      | 3 (11.5)     |                                            | 0            |
| Type 7                                                                                   |                                      | 0            |                                            | 1 (3.6)      |
| Day 3                                                                                    | 29                                   |              | 26                                         |              |
| Type 1                                                                                   |                                      | 0            |                                            | 2 (7.7)      |
| Type 2                                                                                   |                                      | 6 (20.7)     |                                            | 0            |
| Type 3                                                                                   |                                      | 11 (37.9)    |                                            | 14 (53.8)    |
| Type 4                                                                                   |                                      | 5 (17.2)     |                                            | 7 (26.9)     |
| Type 5                                                                                   |                                      | 4 (13.8)     |                                            | 2 (7.7)      |
| Type 6                                                                                   |                                      | 1 (3.4)      |                                            | 0            |
| Type 7                                                                                   |                                      | 2 (6.9)      |                                            | 1 (3.8)      |
| Day 4                                                                                    | 20                                   |              | 19                                         |              |
| Type 1                                                                                   |                                      | 1 (5.0)      |                                            | 3 (15.8)     |
| Type 2                                                                                   |                                      | 4 (20.0)     |                                            | 1 (5.3)      |
| Type 3                                                                                   |                                      | 5 (25.0)     |                                            | 8 (42.1)     |
| Type 4                                                                                   |                                      | 5 (25.0)     |                                            | 5 (26.3)     |
| Type 5                                                                                   |                                      | 4 (20.0)     |                                            | 1 (5.3)      |

|        |    |           |    |           |
|--------|----|-----------|----|-----------|
| Type 6 |    | 1 (5.0)   |    | 0         |
| Type 7 |    | 0         |    | 1 (5.3)   |
| Day 5  | 26 |           | 21 |           |
| Type 1 |    | 2 (7.7)   |    | 2 (9.5)   |
| Type 2 |    | 3 (11.5)  |    | 1 (4.8)   |
| Type 3 |    | 7 (26.9)  |    | 6 (28.6)  |
| Type 4 |    | 8 (30.8)  |    | 7 (33.3)  |
| Type 5 |    | 5 (19.2)  |    | 4 (19.0)  |
| Type 6 |    | 1 (3.8)   |    | 1 (4.8)   |
| Type 7 |    | 0         |    | 0         |
| Day 6  | 29 |           | 27 |           |
| Type 1 |    | 0         |    | 2 (7.4)   |
| Type 2 |    | 4 (13.8)  |    | 4 (14.8)  |
| Type 3 |    | 9 (31.0)  |    | 10 (37.0) |
| Type 4 |    | 10 (34.5) |    | 7 (25.9)  |
| Type 5 |    | 5 (17.2)  |    | 2 (7.4)   |
| Type 6 |    | 0         |    | 1 (3.7)   |
| Type 7 |    | 1 (3.4)   |    | 1 (3.7)   |
| Day 7  | 28 |           | 31 |           |
| Type 1 |    | 2 (7.1)   |    | 2 (6.5)   |
| Type 2 |    | 5 (17.9)  |    | 4 (12.9)  |
| Type 3 |    | 8 (28.6)  |    | 10 (32.3) |
| Type 4 |    | 7 (25.0)  |    | 10 (32.3) |
| Type 5 |    | 5 (17.9)  |    | 3 (9.7)   |
| Type 6 |    | 1 (3.6)   |    | 1 (3.2)   |
| Type 7 |    | 0         |    | 1 (3.2)   |
| Day 8  | 28 |           | 30 |           |
| Type 1 |    | 3 (10.7)  |    | 1 (3.3)   |
| Type 2 |    | 6 (21.4)  |    | 7 (23.3)  |
| Type 3 |    | 8 (28.6)  |    | 7 (23.3)  |
| Type 4 |    | 9 (32.1)  |    | 8 (26.7)  |
| Type 5 |    | 2 (7.1)   |    | 5 (16.7)  |
| Type 6 |    | 0         |    | 0         |

|                          |    |          |          |
|--------------------------|----|----------|----------|
| Type 7                   |    | 0        | 2 (6.7)  |
| Day 9                    | 27 |          | 27       |
| Type 1                   |    | 4 (14.8) | 2 (7.4)  |
| Type 2                   |    | 6 (22.2) | 3 (11.1) |
| Type 3                   |    | 4 (14.8) | 8 (29.6) |
| Type 4                   |    | 7 (25.9) | 9 (33.3) |
| Type 5                   |    | 5 (18.5) | 3 (11.1) |
| Type 6                   |    | 0        | 1 (3.7)  |
| Type 7                   |    | 1 (3.7)  | 1 (3.7)  |
| Day 10/early termination | 22 |          | 27       |
| Type 1                   |    | 2 (9.1)  | 1 (3.7)  |
| Type 2                   |    | 6 (27.3) | 4 (14.8) |
| Type 3                   |    | 4 (18.2) | 9 (33.3) |
| Type 4                   |    | 8 (36.4) | 7 (25.9) |
| Type 5                   |    | 1 (4.5)  | 4 (14.8) |
| Type 6                   |    | 0        | 1 (3.7)  |
| Type 7                   |    | 1 (4.5)  | 1 (3.7)  |

<sup>a</sup>Bristol Stool Form Scale assessed using a 7-point scale of Types 1 (“separate hard lumps, like nuts”), 2 (“sausage-shaped but lumpy”), 3 (“like a sausage or snake but with cracks on its surface”), and 4 (“like a sausage or snake, smooth and soft”), 5 (“soft blobs with clear-cut edges”), 6 (“fluffy pieces with ragged edges, a mushy stool”), and 7 (“watery, no solid pieces”). Types 1–2 are typically classified as “constipation,” types 3–5 as “normal,” and types 6–7 as “diarrhea” (Longstreth et al. 2006)

<sup>b</sup>Analyzed in the evaluable population in individuals with a reported result at the specified visit

## REFERENCES

Longstreth GF, Thompson WG, Chey WD, Houghton LA, Mearin F, Spiller RC (2006) Functional bowel disorders. *Gastroenterology* 130:1480-1491 10.1053/j.gastro.2005.11.061
